# Supplementary material for: Body mass index at birth and early life and colorectal cancer: A two‐sample Mendelian randomization analysis in European and East Asian genetic similarity populations
Source: PubMed Central journal article supplement — Pediatr Obes. 2024 Nov 25;20(1):e13186. doi: 10.1111/ijpo.13186 (PMC11669838; doi:10.1111/ijpo.13186), 2024-11-25
Supplement: IJPO-20-e13186-s001.pdf [file IJPO-20-e13186-s001.pdf]

**Title:** Body mass index at birth and early life and colorectal cancer: A two-sample Mendelian randomization analysis in European and East Asian genetic similarity populations

***Author Names and Contact Details:***

Nikos Papadimitriou, Nutrition and Metabolism Branch, International Agency for Research on Cancer, Lyon, France. papadimitrioun@iarc.who.int

Neil Murphy, Nutrition and Metabolism Branch, International Agency for Research on Cancer, Lyon, France. neilmurphy@gmail.com

Mazda Jenab, Nutrition and Metabolism Branch, International Agency for Research on Cancer, Lyon, France. jenabm@iarc.who.int

Zhishan Chen, Division of Epidemiology, Department of Medicine, Vanderbilt Epidemiology Center, Vanderbilt-Ingram Cancer Center, Vanderbilt University School of Medicine, Nashville, TN, 37232, USA. zhishan118@gmail.com

Hermann Brenner, Division of Clinical Epidemiology and Aging Research, German Cancer Research Center (DKFZ), Heidelberg, Germany. h.brenner@dkfz-heidelberg.de

Sun-Seog Kweon, Department of Preventive Medicine, Chonnam National University Medical School, Gwangju, Korea. ss.kweon2@gmail.com

Loic Le Marchand, University of Hawaii Cancer Center, Honolulu, Hawaii, USA. loic@cc.hawaii.edu

Victor Moreno, Unit of Biomarkers and Susceptibility (UBS), Oncology Data Analytics Program (ODAP), Catalan Institute of Oncology (ICO), L'Hospitalet del Llobregat, 08908 Barcelona, Spain. v.moreno@iconcologia.net

Elizabeth A Platz, Department of Epidemiology, Johns Hopkins Bloomberg School of Public Health, Baltimore, Maryland, USA. eplatz@jhsph.edu

Fränzel JB van Duijnhoven, Division of Human Nutrition, Wageningen University and Research, Wageningen, The Netherlands. franzel.vanduijnhoven@wur.nl

Iona Cheng, Department of Epidemiology and Biostatistics, University of California-San Francisco, San Francisco, California, USA. iona.cheng@ucsf.edu

Rish K Pai, Department of Pathology and Laboratory Medicine, Mayo Clinic Arizona, Scottsdale, AZ, USA. Pai.Rish@mayo.edu

Amanda I Phipps, Department of Epidemiology, University of Washington, Seattle, WA, USA. ahipps@fredhutch.org

Ulrike Peters, Public Health Sciences Division, Fred Hutchinson Cancer Center, Seattle, Washington, USA. upeters@fredhutch.org

Wei Zheng, Division of Epidemiology, Department of Medicine, Vanderbilt Epidemiology Center, Vanderbilt-Ingram Cancer Center, Vanderbilt University School of Medicine, Nashville, TN, 37232, USA. wei.zheng@vumc.org

David J Hughes, Molecular Epidemiology of Cancer Group, School of Biomolecular and Biomedical Science, UCD Conway Institute, University College Dublin, Dublin, Ireland. david.hughes@ucd.ie
