# Supplementary material for: Body mass index at birth and early life and colorectal cancer: A two‐sample Mendelian randomization analysis in European and East Asian genetic similarity populations
Source: PubMed Central journal article supplement — Pediatr Obes. 2024 Nov 25;20(1):e13186. doi: 10.1111/ijpo.13186 (PMC11669838; doi:10.1111/ijpo.13186), 2024-11-25
Supplement: IJPO-20-e13186-s003.pdf [file IJPO-20-e13186-s003.pdf]

## **Body mass index at birth and early life and colorectal cancer: A two-sample Mendelian randomization analysis in populations of European and Asian ancestry**

Nikos Papadimitriou<sup>1</sup>, Neil Murphy<sup>1</sup>, Mazda Jenab<sup>1</sup>, Zhishan Chen<sup>2</sup>, Hermann Brenner<sup>3-5</sup>, Sun-Seog Kweon<sup>6,7</sup>, Loic Le Marchand<sup>8</sup>, Victor Moreno<sup>9-12</sup>, Elizabeth A Platz<sup>13</sup>, Fränzel JB van Duijnhoven<sup>14</sup>, Iona Cheng<sup>15</sup>, Rish K Pai<sup>16</sup>, Amanda I Phipps<sup>17,18</sup>, Ulrike Peters<sup>17,18</sup>, Wei Zheng<sup>2</sup>, David J Hughes<sup>19</sup>

### **Affiliations**

<sup>1</sup> Nutrition and Metabolism Branch, International Agency for Research on Cancer, Lyon, France.

<sup>2</sup> Division of Epidemiology, Department of Medicine, Vanderbilt Epidemiology Center, Vanderbilt-Ingram Cancer Center, Vanderbilt University School of Medicine, Nashville, TN, 37232, USA

<sup>3</sup> Division of Clinical Epidemiology and Aging Research, German Cancer Research Center (DKFZ), Heidelberg, Germany.

<sup>4</sup> Division of Preventive Oncology, German Cancer Research Center (DKFZ) and National Center for Tumor Diseases (NCT), Heidelberg, Germany.

<sup>5</sup> German Cancer Consortium (DKTK), German Cancer Research Center (DKFZ), Heidelberg, Germany.

<sup>6</sup> Department of Preventive Medicine, Chonnam National University Medical School, Gwangju, Korea.

<sup>7</sup> Jeonnam Regional Cancer Center, Chonnam National University Hwasun Hospital, Hwasun, Korea.

<sup>8</sup> University of Hawaii Cancer Center, Honolulu, Hawaii, USA.

<sup>9</sup> Unit of Biomarkers and Suceptibility (UBS), Oncology Data Analytics Program (ODAP), Catalan Institute of Oncology (ICO), L'Hospitalet del Llobregat, 08908 Barcelona, Spain

<sup>10</sup> ONCOBELL Program, Bellvitge Biomedical Research Institute (IDIBELL), L'Hospitalet de Llobregat, 08908 Barcelona, Spain

<sup>11</sup> Consortium for Biomedical Research in Epidemiology and Public Health (CIBERESP), 28029 Madrid, Spain

<sup>12</sup> Department of Clinical Sciences, Faculty of Medicine and health Sciences and Universitat de Barcelona Institute of Complex Systems (UBICS), University of Barcelona (UB), L'Hospitalet de Llobregat, 08908 Barcelona, Spain

<sup>13</sup> Department of Epidemiology, Johns Hopkins Bloomberg School of Public Health, Baltimore, Maryland, USA.

<sup>14</sup> Division of Human Nutrition, Wageningen University and Research, Wageningen, The Netherlands.

<sup>15</sup> Department of Epidemiology and Biostatistics, University of California-San Francisco, San Francisco, California, USA.

<sup>16</sup> Department of Pathology and Laboratory Medicine, Mayo Clinic Arizona, Scottsdale, AZ, USA

<sup>17</sup> Department of Epidemiology, University of Washington, Seattle, WA, USA.

<sup>18</sup> Public Health Sciences Division, Fred Hutchinson Cancer Center, Seattle, Washington, USA.

<sup>19</sup> School of Biomolecular and Biomedical Science, UCD Conway Institute, University College Dublin, Dublin, Ireland.

**Corresponding author:** David J Hughes, School of Biomolecular and Biomedical Science,  
UCD Conway Institute, University College Dublin, Dublin, Ireland. Tel.: + 353 1 716 6988,  
Email: [david.hughes@ucd.ie](mailto:david.hughes@ucd.ie). ORCID: <https://orcid.org/0000-0003-1668-8770>.

## Supplementary material

| <b>Table S1: SNPs of early life BMI</b> |     |                      |    |    |      |       |       |          |            |        |                |     |
|-----------------------------------------|-----|----------------------|----|----|------|-------|-------|----------|------------|--------|----------------|-----|
| SNP                                     | Chr | Position<br>(GRCh37) | EA | OA | EAF  | beta  | se    | P-value  | Cluster    | N      | R <sup>2</sup> | F   |
| rs2767486                               | 1   | 65991203             | G  | A  | 0.16 | 0.143 | 0.012 | 6.40E-34 | Transient  | 28,681 | 0.005497       | 159 |
| rs10493544                              | 1   | 74983835             | T  | C  | 0.43 | 0.054 | 0.009 | 1.40E-08 | Early Rise | 28,681 | 0.001429       | 41  |
| rs545608                                | 1   | 177899121            | C  | G  | 0.23 | 0.088 | 0.016 | 3.20E-08 | Late Rise  | 28,681 | 0.002743       | 79  |
| rs2816985                               | 1   | 200072966            | G  | A  | 0.45 | 0.059 | 0.009 | 5.40E-11 | Transient  | 28,681 | 0.001723       | 50  |
| rs77165542                              | 2   | 430975               | C  | T  | 0.98 | 0.187 | 0.032 | 3.50E-09 | Early Rise | 28,681 | 0.001371       | 39  |
| rs11676272                              | 2   | 25141538             | G  | A  | 0.49 | 0.089 | 0.009 | 2.80E-22 | Early Rise | 28,681 | 0.003959       | 114 |
| rs1032296                               | 4   | 145434688            | T  | C  | 0.38 | 0.052 | 0.009 | 1.10E-08 | Transient  | 28,681 | 0.001274       | 37  |
| rs6899303                               | 5   | 95650975             | C  | A  | 0.63 | 0.057 | 0.009 | 5.30E-11 | Transient  | 28,681 | 0.001515       | 44  |
| rs263377                                | 5   | 95884775             | A  | G  | 0.41 | 0.054 | 0.01  | 2.90E-08 | Transient  | 28,681 | 0.001411       | 41  |
| rs2268657                               | 6   | 39020542             | T  | C  | 0.51 | 0.056 | 0.009 | 8.40E-10 | Transient  | 28,681 | 0.001567       | 45  |
| rs1820721                               | 6   | 39110046             | A  | C  | 0.49 | 0.061 | 0.009 | 7.20E-12 | Transient  | 28,681 | 0.00186        | 53  |
| rs209421                                | 6   | 83523684             | G  | T  | 0.26 | 0.073 | 0.01  | 5.40E-13 | Transient  | 28,681 | 0.002051       | 59  |
| rs1772945                               | 6   | 154312285            | A  | G  | 0.56 | 0.056 | 0.009 | 3.20E-09 | Transient  | 28,681 | 0.001545       | 44  |
| rs17145750                              | 7   | 73026378             | C  | T  | 0.84 | 0.07  | 0.012 | 6.80E-09 | Transient  | 28,681 | 0.001317       | 38  |
| rs10487505                              | 7   | 127860163            | C  | G  | 0.49 | 0.056 | 0.009 | 3.20E-09 | Early Rise | 28,681 | 0.001567       | 45  |
| rs287621                                | 7   | 130435181            | T  | C  | 0.26 | 0.064 | 0.01  | 3.70E-10 | Transient  | 28,681 | 0.001576       | 45  |
| rs12672489                              | 7   | 130483555            | C  | T  | 0.75 | 0.067 | 0.011 | 2.10E-09 | Early Rise | 28,681 | 0.001683       | 48  |
| rs28457693                              | 9   | 98217348             | G  | A  | 0.13 | 0.073 | 0.013 | 2.40E-08 | Transient  | 28,681 | 0.001205       | 35  |
| rs1830890                               | 10  | 96019501             | G  | A  | 0.32 | 0.067 | 0.012 | 1.30E-08 | Early Rise | 28,681 | 0.001954       | 56  |
| rs1985927                               | 11  | 62193537             | C  | T  | 0.73 | 0.06  | 0.011 | 6.80E-09 | Early Rise | 28,681 | 0.001419       | 41  |
| rs2298615                               | 11  | 65352062             | T  | C  | 0.23 | 0.071 | 0.012 | 5.40E-09 | Transient  | 28,681 | 0.001786       | 51  |
| rs2728641                               | 12  | 20111569             | C  | T  | 0.48 | 0.05  | 0.009 | 1.90E-08 | Transient  | 28,681 | 0.001248       | 36  |
| rs7132908                               | 12  | 50263148             | A  | G  | 0.4  | 0.081 | 0.014 | 3.30E-09 | Late Rise  | 28,681 | 0.003149       | 91  |
| rs6538845                               | 12  | 98544888             | C  | T  | 0.48 | 0.055 | 0.009 | 1.50E-09 | Early Rise | 28,681 | 0.00151        | 43  |

|                                                                                                                                                        |    |           |   |   |      |       |       |          |            |        |          |     |
|--------------------------------------------------------------------------------------------------------------------------------------------------------|----|-----------|---|---|------|-------|-------|----------|------------|--------|----------|-----|
| rs3741508                                                                                                                                              | 12 | 124812678 | T | G | 0.86 | 0.083 | 0.013 | 1.20E-09 | Transient  | 28,681 | 0.001659 | 48  |
| rs2585058                                                                                                                                              | 15 | 84284552  | G | A | 0.53 | 0.063 | 0.009 | 8.60E-12 | Transient  | 28,681 | 0.001977 | 57  |
| rs17817288                                                                                                                                             | 16 | 53807764  | G | A | 0.49 | 0.095 | 0.013 | 1.30E-12 | Late Rise  | 28,681 | 0.004511 | 130 |
| rs111810144                                                                                                                                            | 16 | 67216110  | T | C | 0.03 | 0.147 | 0.025 | 5.20E-09 | Early Rise | 28,681 | 0.001258 | 36  |
| rs78263856                                                                                                                                             | 18 | 58042821  | T | C | 0.95 | 0.15  | 0.027 | 3.80E-08 | Late Rise  | 28,681 | 0.002138 | 61  |
| rs148252705                                                                                                                                            | 20 | 17851179  | T | C | 0.97 | 0.157 | 0.029 | 2.60E-08 | Transient  | 28,681 | 0.001435 | 41  |
| rs13038017                                                                                                                                             | 20 | 31467551  | C | T | 0.53 | 0.054 | 0.009 | 1.20E-08 | Early Rise | 28,681 | 0.001453 | 42  |
| Abbreviations: BMI body mass index; chr chromosome; EA effect allele; EAF effect allele frequency; OA other allele; SNP single nucleotide polymorphism |    |           |   |   |      |       |       |          |            |        |          |     |

| <b>Table S2: SNPs of birth BMI</b>                                                                                                                     |     |                      |    |    |      |       |       |          |        |                |     |
|--------------------------------------------------------------------------------------------------------------------------------------------------------|-----|----------------------|----|----|------|-------|-------|----------|--------|----------------|-----|
| SNP                                                                                                                                                    | Chr | Position<br>(GRCh37) | EA | OA | EAF  | Beta  | SE    | P-value  | N      | R <sup>2</sup> | F   |
| rs11708067                                                                                                                                             | 3   | 123065778            | G  | A  | 0.23 | 0.079 | 0.01  | 5.20E-16 | 28,681 | 0.002211       | 64  |
| rs1482853                                                                                                                                              | 3   | 156798473            | C  | A  | 0.6  | 0.099 | 0.008 | 5.90E-32 | 28,681 | 0.004704       | 136 |
| rs7772579                                                                                                                                              | 6   | 152042502            | A  | C  | 0.7  | 0.065 | 0.009 | 5.90E-13 | 28,681 | 0.001775       | 51  |
| rs28642213                                                                                                                                             | 9   | 139248082            | A  | G  | 0.27 | 0.062 | 0.01  | 4.70E-11 | 28,681 | 0.001515       | 44  |
| rs11187129                                                                                                                                             | 10  | 94429907             | C  | T  | 0.46 | 0.047 | 0.008 | 2.10E-08 | 28,681 | 0.001097       | 32  |
| rs7310615                                                                                                                                              | 12  | 111865049            | G  | C  | 0.55 | 0.05  | 0.009 | 6.50E-09 | 28,681 | 0.001238       | 36  |
| rs75806555                                                                                                                                             | 14  | 101189448            | C  | T  | 0.86 | 0.074 | 0.012 | 2.10E-09 | 28,681 | 0.001319       | 38  |
| rs739669                                                                                                                                               | 17  | 7122377              | A  | G  | 0.62 | 0.072 | 0.009 | 4.70E-17 | 28,681 | 0.002443       | 70  |
| Abbreviations: BMI body mass index; chr chromosome; EA effect allele; EAF effect allele frequency; OA other allele; SNP single nucleotide polymorphism |     |                      |    |    |      |       |       |          |        |                |     |

**Table S3: Cancer betas in the CRC consortium (overall cancer only) or CCFR/CORECT/GECCO (remaining outcomes) for SNPs of early life BMI**

| A) men and women |         |        |         |        |           |         |           |         |         |        |
|------------------|---------|--------|---------|--------|-----------|---------|-----------|---------|---------|--------|
| SNP              | beta_ca | se_ca  | beta_co | se_co  | beta_prox | se_prox | beta_dist | se_dist | beta_re | se_re  |
| rs2767486        | 0.0093  | 0.0092 | 0.0197  | 0.013  | 0.0119    | 0.0169  | 0.0273    | 0.0171  | 0.0187  | 0.0169 |
| rs10493544       | -0.0103 | 0.0075 | 0.0066  | 0.0108 | 0.0072    | 0.0139  | 0.013     | 0.0142  | 0.0021  | 0.014  |
| rs545608         | -0.0077 | 0.0093 | 0.0117  | 0.0135 | 0.0192    | 0.0174  | 0.0059    | 0.0178  | 0.0063  | 0.0175 |
| rs2816985        | 0.0064  | 0.0074 | 0.0019  | 0.0107 | -0.0136   | 0.0138  | 0.0084    | 0.014   | 0.012   | 0.0138 |
| rs77165542       | 0.0401  | 0.0227 | 0.062   | 0.0321 | 0.0729    | 0.042   | 0.0471    | 0.0424  | 0.0342  | 0.0419 |
| rs11676272       | -0.0061 | 0.0073 | 0.0005  | 0.0106 | 0.0064    | 0.0137  | -0.0012   | 0.014   | 0.0025  | 0.0137 |
| rs1032296        | 0.0301  | 0.0075 | 0.0185  | 0.0108 | 0.0169    | 0.014   | 0.0168    | 0.0142  | 0.0314  | 0.014  |
| rs6899303        | -0.0037 | 0.0076 | 0.0121  | 0.0108 | 0.0065    | 0.014   | 0.0233    | 0.0143  | -0.0028 | 0.0141 |
| rs263377         | -0.0068 | 0.0075 | -0.0151 | 0.0108 | -0.01     | 0.0139  | -0.0234   | 0.0142  | -0.003  | 0.0139 |
| rs2268657        | -0.0100 | 0.0075 | -0.019  | 0.0108 | -0.0042   | 0.014   | -0.0303   | 0.0142  | -0.0085 | 0.014  |
| rs1820721        | 0.0058  | 0.0073 | 0.0046  | 0.0106 | 0.0132    | 0.0137  | -0.005    | 0.0139  | 0.0045  | 0.0137 |
| rs209421         | 0.0036  | 0.0083 | -0.0086 | 0.012  | -0.0124   | 0.0155  | 0.0008    | 0.0157  | -0.022  | 0.0155 |
| rs1772945        | -0.0270 | 0.0074 | -0.0242 | 0.0106 | -0.0163   | 0.0137  | -0.0302   | 0.0139  | -0.0205 | 0.0137 |
| rs17145750       | -0.0172 | 0.0101 | -0.0042 | 0.0147 | 0.0056    | 0.0191  | -0.0075   | 0.0194  | -0.0205 | 0.0189 |
| rs10487505       | 0.0066  | 0.0074 | 0.0132  | 0.0106 | 0.0053    | 0.0137  | 0.021     | 0.014   | -0.0116 | 0.0138 |
| rs287621         | 0.0121  | 0.0082 | 0.008   | 0.0117 | -0.0045   | 0.0152  | 0.0249    | 0.0154  | 0.0217  | 0.0152 |
| rs12672489       | -0.0051 | 0.0085 | 0.014   | 0.0123 | 0.0196    | 0.0159  | 0.0102    | 0.0161  | -0.0135 | 0.0158 |
| rs28457693       | 0.0081  | 0.0119 | -0.0031 | 0.0173 | -0.0173   | 0.0224  | 0.0203    | 0.0226  | 0.0185  | 0.0221 |
| rs1830890        | 0.0121  | 0.0078 | 0.0001  | 0.0112 | -0.0077   | 0.0145  | 0.007     | 0.0147  | 0.017   | 0.0145 |
| rs1985927        | 0.0000  | 0.0083 | -0.0014 | 0.0119 | -0.005    | 0.0154  | -0.0006   | 0.0157  | -0.0113 | 0.0154 |
| rs2298615        | 0.0062  | 0.0089 | 0.0121  | 0.0126 | 0.001     | 0.0163  | 0.0083    | 0.0167  | -0.0166 | 0.0164 |
| rs2728641        | -0.0148 | 0.0074 | -0.0098 | 0.0107 | 0.0008    | 0.0139  | -0.0225   | 0.0141  | -0.0161 | 0.0139 |
| rs7132908        | 0.0027  | 0.0076 | -0.0004 | 0.0109 | -0.0029   | 0.0141  | 0.0005    | 0.0144  | 0.0001  | 0.0141 |
| rs6538845        | -0.0152 | 0.0074 | -0.0265 | 0.0106 | -0.0277   | 0.0137  | -0.0178   | 0.014   | 0.003   | 0.0137 |
| rs3741508        | 0.0262  | 0.0110 | 0.0068  | 0.0161 | 0.0129    | 0.0209  | -0.0081   | 0.0212  | 0.0605  | 0.0211 |







|                                                                                                                                  |         |        |  |  |  |  |  |  |  |  |
|----------------------------------------------------------------------------------------------------------------------------------|---------|--------|--|--|--|--|--|--|--|--|
| rs28457693                                                                                                                       | -0.0219 | 0.0201 |  |  |  |  |  |  |  |  |
| rs1830890                                                                                                                        | -0.0074 | 0.0132 |  |  |  |  |  |  |  |  |
| rs1985927                                                                                                                        | 0.0137  | 0.0141 |  |  |  |  |  |  |  |  |
| rs2298615                                                                                                                        | -0.0066 | 0.0151 |  |  |  |  |  |  |  |  |
| rs2728641                                                                                                                        | -0.0051 | 0.0128 |  |  |  |  |  |  |  |  |
| rs7132908                                                                                                                        | 0.011   | 0.013  |  |  |  |  |  |  |  |  |
| rs6538845                                                                                                                        | -0.0069 | 0.0126 |  |  |  |  |  |  |  |  |
| rs3741508                                                                                                                        | 0.0023  | 0.0187 |  |  |  |  |  |  |  |  |
| rs2585058                                                                                                                        | -0.0043 | 0.0126 |  |  |  |  |  |  |  |  |
| rs17817288                                                                                                                       | -0.0024 | 0.0125 |  |  |  |  |  |  |  |  |
| rs111810144                                                                                                                      | 0.0412  | 0.0376 |  |  |  |  |  |  |  |  |
| rs78263856                                                                                                                       | 0.0127  | 0.033  |  |  |  |  |  |  |  |  |
| rs148252705                                                                                                                      | 0.0192  | 0.035  |  |  |  |  |  |  |  |  |
| rs13038017                                                                                                                       | 0.0022  | 0.0127 |  |  |  |  |  |  |  |  |
| Abbreviations: ca cancer; co colon; dist distal; prox proximal; re rectal; se standard error; SNP single nucleotide polymorphism |         |        |  |  |  |  |  |  |  |  |



|                                                                                                                                  |         |        |  |  |  |  |  |  |  |  |
|----------------------------------------------------------------------------------------------------------------------------------|---------|--------|--|--|--|--|--|--|--|--|
| rs7310615                                                                                                                        | 0.0727  | 0.013  |  |  |  |  |  |  |  |  |
| rs75806555                                                                                                                       | 0.0045  | 0.02   |  |  |  |  |  |  |  |  |
| rs739669                                                                                                                         | -0.0224 | 0.0133 |  |  |  |  |  |  |  |  |
| Abbreviations: ca cancer; co colon; dist distal; prox proximal; re rectal; se standard error; SNP single nucleotide polymorphism |         |        |  |  |  |  |  |  |  |  |

**Table S5: Cancer betas in Finngen for SNPs of early life BMI**

| SNP         | beta_co | se_co  | beta_re | se_re  |
|-------------|---------|--------|---------|--------|
| rs2767486   | 0.0074  | 0.0359 | -0.0389 | 0.0461 |
| rs10493544  | 0.0121  | 0.0225 | 0.0324  | 0.0289 |
| rs545608    | 0.0279  | 0.0292 | 0.0153  | 0.0375 |
| rs2816985   | -0.0036 | 0.0229 | -0.0216 | 0.0293 |
| rs77165542  | -0.0567 | 0.0876 | -0.0845 | 0.1119 |
| rs11676272  | 0.0083  | 0.0228 | 0.0176  | 0.0293 |
| rs1032296   | 0.0272  | 0.0238 | -0.0093 | 0.0305 |
| rs6899303   | -0.0089 | 0.0250 | -0.0489 | 0.0322 |
| rs263377    | 0.0160  | 0.0226 | -0.0005 | 0.0290 |
| rs2268657   | 0.0092  | 0.0226 | 0.0202  | 0.0290 |
| rs1820721   | -0.0192 | 0.0226 | -0.0016 | 0.0290 |
| rs209421    | -0.0154 | 0.0250 | -0.0021 | 0.0320 |
| rs1772945   | -0.0200 | 0.0226 | -0.0293 | 0.0289 |
| rs17145750  | -0.0089 | 0.0315 | -0.0120 | 0.0403 |
| rs10487505  | 0.0176  | 0.0225 | -0.0370 | 0.0289 |
| rs287621    | -0.0166 | 0.0249 | 0.0168  | 0.0319 |
| rs12672489  | -0.0147 | 0.0267 | -0.0246 | 0.0341 |
| rs28457693  | -0.0358 | 0.0359 | -0.0033 | 0.0460 |
| rs1830890   | -0.0065 | 0.0251 | -0.0217 | 0.0322 |
| rs1985927   | -0.0346 | 0.0256 | 0.0151  | 0.0328 |
| rs2298615   | -0.0170 | 0.0315 | 0.0188  | 0.0404 |
| rs2728641   | -0.0198 | 0.0227 | 0.0580  | 0.0291 |
| rs7132908   | -0.0405 | 0.0232 | 0.0500  | 0.0297 |
| rs6538845   | 0.0203  | 0.0226 | -0.0557 | 0.0290 |
| rs3741508   | 0.0352  | 0.0261 | -0.0366 | 0.0335 |
| rs2585058   | -0.0187 | 0.0225 | -0.0220 | 0.0289 |
| rs17817288  | -0.0189 | 0.0225 | 0.0242  | 0.0288 |
| rs111810144 | -0.0687 | 0.0888 | -0.1273 | 0.1146 |
| rs78263856  | 0.0406  | 0.0711 | 0.0611  | 0.0916 |
| rs148252705 | -0.0097 | 0.0806 | -0.0830 | 0.1027 |
| rs13038017  | 0.0296  | 0.0229 | 0.0010  | 0.0295 |

Abbreviations: co colon; re rectal; se standard error;  
SNP single nucleotide polymorphism

**Table S6: Cancer betas in Finngen for SNPs of birth BMI**

| SNP        | beta_co | se_co  | beta_re | se_re  |
|------------|---------|--------|---------|--------|
| rs11708067 | -0.0122 | 0.0300 | 0.0974  | 0.0384 |
| rs1482853  | -0.0179 | 0.0243 | 0.0043  | 0.0312 |
| rs7772579  | -0.0515 | 0.0236 | 0.0007  | 0.0303 |
| rs28642213 | -0.0350 | 0.0244 | -0.0094 | 0.0313 |
| rs11187129 | -0.0301 | 0.0226 | -0.0213 | 0.0288 |
| rs7310615  | 0.0430  | 0.0229 | 0.0600  | 0.0292 |
| rs75806555 | -0.0028 | 0.0318 | 0.0542  | 0.0406 |
| rs739669   | 0.0215  | 0.0239 | 0.0634  | 0.0306 |

Abbreviations: co colon; re rectal; se standard error; SNP single nucleotide polymorphism

**Table S7: Cancer betas in ACCC for SNPs of early life BMI**

| SNP                                                                             | beta_ca | se_ca  |
|---------------------------------------------------------------------------------|---------|--------|
| rs2767486                                                                       | -0.0185 | 0.0392 |
| rs10493544                                                                      | 0.0366  | 0.0241 |
| rs545608                                                                        | 0.0076  | 0.0148 |
| rs2816985                                                                       | -0.0219 | 0.014  |
| rs11676272                                                                      | -0.0291 | 0.0125 |
| rs1032296                                                                       | 0.0005  | 0.0138 |
| rs6899303                                                                       | 0.0018  | 0.0131 |
| rs263377                                                                        | 0.0382  | 0.0212 |
| rs2268657                                                                       | -0.0186 | 0.014  |
| rs1820721                                                                       | -0.0262 | 0.014  |
| rs1772945                                                                       | 0.0177  | 0.0147 |
| rs17145750                                                                      | 0.0309  | 0.0206 |
| rs10487505                                                                      | -0.0035 | 0.0143 |
| rs287621                                                                        | 0.0347  | 0.0131 |
| rs12672489                                                                      | 0.0156  | 0.0167 |
| rs28457693                                                                      | 0.0038  | 0.0168 |
| rs1830890                                                                       | 0.0212  | 0.0142 |
| rs1985927                                                                       | -0.0166 | 0.0136 |
| rs2298615                                                                       | 0.0017  | 0.0219 |
| rs2728641                                                                       | -0.0195 | 0.0141 |
| rs7132908                                                                       | -0.0005 | 0.0148 |
| rs6538845                                                                       | 0.0141  | 0.014  |
| rs3741508                                                                       | -0.005  | 0.0136 |
| rs2585058                                                                       | -0.0049 | 0.0132 |
| rs17817288                                                                      | 0.0132  | 0.0128 |
| rs111810144                                                                     | 0.2045  | 0.1347 |
| rs13038017                                                                      | 0.0367  | 0.0209 |
| Abbreviations: ca cancer; se standard error; SNP single nucleotide polymorphism |         |        |

**Table S8: Cancer betas in ACCC for SNPs of birth BMI**

| SNP        | beta_ca | se_ca  |
|------------|---------|--------|
| rs1482853  | 0.0134  | 0.0131 |
| rs7772579  | 0.0251  | 0.0170 |
| rs28642213 | -0.0014 | 0.0255 |
| rs11187129 | -0.0041 | 0.0160 |
| rs75806555 | -0.0886 | 0.0641 |
| rs739669   | 0.0211  | 0.0140 |

Abbreviations: ca cancer; se standard error; SNP single nucleotide polymorphism



**Table S9: Mendelian randomization results for overall early life BMI**

|                                   | CRC consortium or CCFR/CORECT/GECCO |            |         |                                           | Finngen         |            |         |                                           | ACCC            |            |         |                                           |
|-----------------------------------|-------------------------------------|------------|---------|-------------------------------------------|-----------------|------------|---------|-------------------------------------------|-----------------|------------|---------|-------------------------------------------|
|                                   | Estimates (OR)*                     | 95% CI     | P-value | P-value for pleiotropy† or heterogeneity‡ | Estimates (OR)* | 95% CI     | P-value | P-value for pleiotropy† or heterogeneity‡ | Estimates (OR)* | 95% CI     | P-value | P-value for pleiotropy† or heterogeneity‡ |
| <b>MEN &amp; WOMEN</b>            |                                     |            |         |                                           |                 |            |         |                                           |                 |            |         |                                           |
| <b>Colorectal cancer</b>          |                                     |            |         |                                           |                 |            |         |                                           |                 |            |         |                                           |
| Inverse-variance weighted         | 1.01                                | 0.95, 1.07 | 0.80    | 8×10 <sup>-5</sup>                        |                 |            |         |                                           | 1.02            | 0.91, 1.14 | 0.73    | 0.01                                      |
| MR-Egger                          | 1.12                                | 0.91, 1.36 | 0.27    | 0.02                                      |                 |            |         |                                           | 0.94            | 0.55, 1.60 | 0.83    | 0.77                                      |
| Weighted median                   | 1.03                                | 0.97, 1.11 | 0.28    |                                           |                 |            |         |                                           | 1.01            | 0.89, 1.16 | 0.83    |                                           |
| MR-PRESSO (-rs1032296, rs1772945) | 1.01                                | 0.96, 1.06 | 0.73    |                                           |                 |            |         |                                           |                 |            |         |                                           |
| <b>Colon cancer</b>               |                                     |            |         |                                           |                 |            |         |                                           |                 |            |         |                                           |
| Inverse-variance weighted         | 1.03                                | 0.96, 1.09 | 0.38    | 0.19                                      | 0.95            | 0.83, 1.11 | 0.53    | 0.78                                      |                 |            |         |                                           |
| MR-Egger                          | 1.25                                | 1.02, 1.52 | 0.03    | 0.05                                      | 0.87            | 0.54, 1.40 | 0.57    | 0.70                                      |                 |            |         |                                           |
| Weighted median                   | 1.03                                | 0.94, 1.13 | 0.48    |                                           | 0.90            | 0.75, 1.40 | 0.25    |                                           |                 |            |         |                                           |
| <b>Proximal colon cancer</b>      |                                     |            |         |                                           |                 |            |         |                                           |                 |            |         |                                           |
| Inverse-variance weighted         | 1.02                                | 0.94, 1.11 | 0.63    | 0.82                                      |                 |            |         |                                           |                 |            |         |                                           |
| MR-Egger                          | 1.22                                | 0.95, 1.55 | 0.12    | 0.14                                      |                 |            |         |                                           |                 |            |         |                                           |
| Weighted median                   | 1.05                                | 0.94, 1.16 | 0.39    |                                           |                 |            |         |                                           |                 |            |         |                                           |
| <b>Distal colon cancer</b>        |                                     |            |         |                                           |                 |            |         |                                           |                 |            |         |                                           |
| Inverse-variance weighted         | 1.04                                | 0.96, 1.13 | 0.34    | 0.30                                      |                 |            |         |                                           |                 |            |         |                                           |
| MR-Egger                          | 1.22                                | 0.94, 1.60 | 0.13    | 0.20                                      |                 |            |         |                                           |                 |            |         |                                           |
| Weighted median                   | 1.06                                | 0.95, 1.19 | 0.28    |                                           |                 |            |         |                                           |                 |            |         |                                           |
| <b>Rectal cancer</b>              |                                     |            |         |                                           |                 |            |         |                                           |                 |            |         |                                           |
| Inverse-variance weighted         | 1.03                                | 0.93, 1.11 | 0.67    | 0.16                                      | 0.95            | 0.80, 1.13 | 0.57    | 0.68                                      |                 |            |         |                                           |
| MR-Egger                          | 1.31                                | 1.00, 1.70 | 0.05    | 0.05                                      | 0.93            | 0.51, 1.72 | 0.81    | 0.93                                      |                 |            |         |                                           |
| Weighted median                   | 1.03                                | 0.92, 1.15 | 0.59    |                                           | 0.97            | 0.76, 1.26 | 0.82    |                                           |                 |            |         |                                           |
| <b>MEN</b>                        |                                     |            |         |                                           |                 |            |         |                                           |                 |            |         |                                           |
| <b>Colorectal cancer</b>          |                                     |            |         |                                           |                 |            |         |                                           |                 |            |         |                                           |
| Inverse-variance weighted         | 1.02                                | 0.93, 1.12 | 0.64    | 0.03                                      |                 |            |         |                                           |                 |            |         |                                           |
| MR-Egger                          | 1.28                                | 0.98, 1.68 | 0.07    | 0.08                                      |                 |            |         |                                           |                 |            |         |                                           |
| Weighted median                   | 0.95                                | 0.85, 1.05 | 0.32    |                                           |                 |            |         |                                           |                 |            |         |                                           |
| <b>WOMEN</b>                      |                                     |            |         |                                           |                 |            |         |                                           |                 |            |         |                                           |
| <b>Colorectal cancer</b>          |                                     |            |         |                                           |                 |            |         |                                           |                 |            |         |                                           |
| Inverse-variance weighted         | 1.03                                | 0.96, 1.11 | 0.44    | 0.69                                      |                 |            |         |                                           |                 |            |         |                                           |
| MR-Egger                          | 1.19                                | 0.94, 1.49 | 0.14    | 0.20                                      |                 |            |         |                                           |                 |            |         |                                           |
| Weighted median                   | 1.01                                | 0.91, 1.12 | 0.88    |                                           |                 |            |         |                                           |                 |            |         |                                           |

Abbreviations: CI, confidence intervals; MR: Mendelian Randomization; OR: odds ratio; MR-PRESSO: MR pleiotropy residual sum and outlier test

\* The estimates correspond to a standard deviation increase in duration of sedentary activity

† P-value or pleiotropy based on MR-Egger intercept

---

‡ P-value for heterogeneity based on Q statistic

**Table S10: Mendelian randomization results for transient BMI**

|                                   | CRC consortium or CCFR/CORECT/GECCO |            |         |                                           | FinnGen         |            |         |                                           | ACCC            |            |         |                                           |
|-----------------------------------|-------------------------------------|------------|---------|-------------------------------------------|-----------------|------------|---------|-------------------------------------------|-----------------|------------|---------|-------------------------------------------|
|                                   | Estimates (OR)*                     | 95% CI     | P-value | P-value for pleiotropy† or heterogeneity‡ | Estimates (OR)* | 95% CI     | P-value | P-value for pleiotropy† or heterogeneity‡ | Estimates (OR)* | 95% CI     | P-value | P-value for pleiotropy† or heterogeneity‡ |
| <b>MEN &amp; WOMEN</b>            |                                     |            |         |                                           |                 |            |         |                                           |                 |            |         |                                           |
| <b>Colorectal cancer</b>          |                                     |            |         |                                           |                 |            |         |                                           |                 |            |         |                                           |
| Inverse-variance weighted         | 1.02                                | 0.92, 1.13 | 0.74    | 2×10 <sup>-5</sup>                        |                 |            |         |                                           | 0.99            | 0.84, 1.16 | 0.94    | 0.04                                      |
| MR-Egger                          | 1.14                                | 0.93, 1.62 | 0.46    | 0.51                                      |                 |            |         |                                           | 1.06            | 0.44, 2.53 | 0.89    | 0.88                                      |
| Weighted median                   | 1.06                                | 0.97, 1.16 | 0.17    |                                           |                 |            |         |                                           | 0.96            | 0.80, 1.15 | 0.69    |                                           |
| MR-PRESSO (-rs1032296, rs1772945) | 1.02                                | 0.96, 1.08 | 0.53    |                                           |                 |            |         |                                           |                 |            |         |                                           |
| <b>Colon cancer</b>               |                                     |            |         |                                           |                 |            |         |                                           |                 |            |         |                                           |
| Inverse-variance weighted         | 1.00                                | 0.91, 1.11 | 0.97    | 0.18                                      | 0.94            | 0.78, 1.13 | 0.50    | 0.92                                      |                 |            |         |                                           |
| MR-Egger                          | 1.26                                | 0.95, 1.68 | 0.11    | 0.10                                      | 1.11            | 0.55, 2.18 | 0.78    | 0.63                                      |                 |            |         |                                           |
| Weighted median                   | 1.07                                | 0.95, 1.20 | 0.27    |                                           | 0.87            | 0.68, 1.12 | 0.28    |                                           |                 |            |         |                                           |
| <b>Proximal colon cancer</b>      |                                     |            |         |                                           |                 |            |         |                                           |                 |            |         |                                           |
| Inverse-variance weighted         | 0.97                                | 0.88, 1.08 | 0.65    | 0.84                                      |                 |            |         |                                           |                 |            |         |                                           |
| MR-Egger                          | 1.11                                | 0.79, 1.55 | 0.55    | 0.44                                      |                 |            |         |                                           |                 |            |         |                                           |
| Weighted median                   | 1.01                                | 0.88, 1.17 | 0.84    |                                           |                 |            |         |                                           |                 |            |         |                                           |
| <b>Distal colon cancer</b>        |                                     |            |         |                                           |                 |            |         |                                           |                 |            |         |                                           |
| Inverse-variance weighted         | 1.02                                | 0.91, 1.13 | 0.75    | 0.06                                      |                 |            |         |                                           |                 |            |         |                                           |
| MR-Egger                          | 1.38                                | 0.90, 2.10 | 0.14    | 0.14                                      |                 |            |         |                                           |                 |            |         |                                           |
| Weighted median                   | 1.11                                | 0.94, 1.28 | 0.23    |                                           |                 |            |         |                                           |                 |            |         |                                           |
| <b>Rectal cancer</b>              |                                     |            |         |                                           |                 |            |         |                                           |                 |            |         |                                           |
| Inverse-variance weighted         | 1.03                                | 0.89, 1.19 | 0.71    | 0.03                                      | 0.88            | 0.69, 1.11 | 0.27    | 0.81                                      |                 |            |         |                                           |
| MR-Egger                          | 1.30                                | 0.82, 2.03 | 0.27    | 0.30                                      | 0.55            | 0.23, 1.31 | 0.18    | 0.28                                      |                 |            |         |                                           |
| Weighted median                   | 1.08                                | 0.92, 1.27 | 0.32    |                                           | 0.83            | 0.61, 1.13 | 0.24    |                                           |                 |            |         |                                           |
| <b>MEN</b>                        |                                     |            |         |                                           |                 |            |         |                                           |                 |            |         |                                           |
| <b>Colorectal cancer</b>          |                                     |            |         |                                           |                 |            |         |                                           |                 |            |         |                                           |
| Inverse-variance weighted         | 1.03                                | 0.90, 1.17 | 0.65    | 0.01                                      |                 |            |         |                                           |                 |            |         |                                           |
| MR-Egger                          | 1.36                                | 0.90, 2.05 | 0.15    | 0.18                                      |                 |            |         |                                           |                 |            |         |                                           |
| Weighted median                   | 1.03                                | 0.89, 1.20 | 0.71    |                                           |                 |            |         |                                           |                 |            |         |                                           |
| <b>WOMEN</b>                      |                                     |            |         |                                           |                 |            |         |                                           |                 |            |         |                                           |
| <b>Colorectal cancer</b>          |                                     |            |         |                                           |                 |            |         |                                           |                 |            |         |                                           |
| Inverse-variance weighted         | 0.98                                | 0.89, 1.08 | 0.69    | 0.48                                      |                 |            |         |                                           |                 |            |         |                                           |
| MR-Egger                          | 1.05                                | 0.76, 1.45 | 0.75    | 0.65                                      |                 |            |         |                                           |                 |            |         |                                           |
| Weighted median                   | 0.97                                | 0.84, 1.12 | 0.65    |                                           |                 |            |         |                                           |                 |            |         |                                           |

Abbreviations: CI, confidence intervals; MR: Mendelian Randomization; OR: odds ratio; MR-PRESSO: MR pleiotropy residual sum and outlier test

\* The estimates correspond to a standard deviation increase in duration of sedentary activity

† P-value or pleiotropy based on MR-Egger intercept

---

‡ P-value for heterogeneity based on Q statistic

**Table S11: Mendelian randomization results for early rise BMI**

|                              | CRC consortium or CCFR/CORECT/GECCO |            |         |                                           | Finngen         |            |         |                                           | ACCC            |            |         |                                           |
|------------------------------|-------------------------------------|------------|---------|-------------------------------------------|-----------------|------------|---------|-------------------------------------------|-----------------|------------|---------|-------------------------------------------|
|                              | Estimates (OR)*                     | 95% CI     | P-value | P-value for pleiotropy† or heterogeneity‡ | Estimates (OR)* | 95% CI     | P-value | P-value for pleiotropy† or heterogeneity‡ | Estimates (OR)* | 95% CI     | P-value | P-value for pleiotropy† or heterogeneity‡ |
| <b>MEN &amp; WOMEN</b>       |                                     |            |         |                                           |                 |            |         |                                           |                 |            |         |                                           |
| <b>Colorectal cancer</b>     |                                     |            |         |                                           |                 |            |         |                                           |                 |            |         |                                           |
| Inverse-variance weighted    | 1.01                                | 0.91, 1.12 | 0.89    | 0.09                                      |                 |            |         |                                           | 1.01            | 0.79, 1.28 | 0.94    | 0.02                                      |
| MR-Egger                     | 1.17                                | 0.85, 1.62 | 0.32    | 0.32                                      |                 |            |         |                                           | 0.41            | 0.13, 1.34 | 0.14    | 0.13                                      |
| Weighted median              | 0.99                                | 0.89, 1.12 | 0.91    |                                           |                 |            |         |                                           | 0.92            | 0.71, 1.20 | 0.53    |                                           |
| MR-PRESSO (- rs11676272)     |                                     |            |         |                                           |                 |            |         |                                           | 1.20            | 0.94, 1.51 | 0.14    |                                           |
| <b>Colon cancer</b>          |                                     |            |         |                                           |                 |            |         |                                           |                 |            |         |                                           |
| Inverse-variance weighted    | 1.07                                | 0.93, 1.22 | 0.32    | 0.13                                      | 1.03            | 0.81, 1.31 | 0.80    | 0.67                                      |                 |            |         |                                           |
| MR-Egger                     | 1.27                                | 0.82, 1.97 | 0.29    | 0.42                                      | 0.58            | 0.24, 1.43 | 0.24    | 0.19                                      |                 |            |         |                                           |
| Weighted median              | 1.04                                | 0.90, 1.21 | 0.60    |                                           | 1.07            | 0.77, 1.49 | 0.68    |                                           |                 |            |         |                                           |
| <b>Proximal colon cancer</b> |                                     |            |         |                                           |                 |            |         |                                           |                 |            |         |                                           |
| Inverse-variance weighted    | 1.07                                | 0.92, 1.25 | 0.33    | 0.33                                      |                 |            |         |                                           |                 |            |         |                                           |
| MR-Egger                     | 1.49                                | 0.93, 2.36 | 0.09    | 0.15                                      |                 |            |         |                                           |                 |            |         |                                           |
| Weighted median              | 1.09                                | 0.90, 1.32 | 0.36    |                                           |                 |            |         |                                           |                 |            |         |                                           |
| <b>Distal colon cancer</b>   |                                     |            |         |                                           |                 |            |         |                                           |                 |            |         |                                           |
| Inverse-variance weighted    | 1.11                                | 0.95, 1.27 | 0.18    | 0.72                                      |                 |            |         |                                           |                 |            |         |                                           |
| MR-Egger                     | 1.08                                | 0.68, 1.73 | 0.73    | 0.95                                      |                 |            |         |                                           |                 |            |         |                                           |
| Weighted median              | 1.11                                | 0.91, 1.34 | 0.31    |                                           |                 |            |         |                                           |                 |            |         |                                           |
| <b>Rectal cancer</b>         |                                     |            |         |                                           |                 |            |         |                                           |                 |            |         |                                           |
| Inverse-variance weighted    | 1.00                                | 0.87, 1.15 | 0.97    | 0.75                                      | 0.84            | 0.62, 1.15 | 0.28    | 0.46                                      |                 |            |         |                                           |
| MR-Egger                     | 1.35                                | 0.86, 2.14 | 0.19    | 0.17                                      | 0.78            | 0.23, 2.61 | 0.69    | 0.90                                      |                 |            |         |                                           |
| Weighted median              | 1.03                                | 0.85, 1.25 | 0.74    |                                           | 0.85            | 0.56, 1.31 | 0.48    |                                           |                 |            |         |                                           |
| <b>MEN</b>                   |                                     |            |         |                                           |                 |            |         |                                           |                 |            |         |                                           |
| <b>Colorectal cancer</b>     |                                     |            |         |                                           |                 |            |         |                                           |                 |            |         |                                           |
| Inverse-variance weighted    | 0.99                                | 0.87, 1.13 | 0.86    | 0.32                                      |                 |            |         |                                           |                 |            |         |                                           |
| MR-Egger                     | 1.11                                | 0.69, 1.75 | 0.68    | 0.63                                      |                 |            |         |                                           |                 |            |         |                                           |
| Weighted median              | 0.90                                | 0.76, 1.08 | 0.28    |                                           |                 |            |         |                                           |                 |            |         |                                           |
| <b>WOMEN</b>                 |                                     |            |         |                                           |                 |            |         |                                           |                 |            |         |                                           |
| <b>Colorectal cancer</b>     |                                     |            |         |                                           |                 |            |         |                                           |                 |            |         |                                           |
| Inverse-variance weighted    | 1.08                                | 0.95, 1.23 | 0.25    | 0.63                                      |                 |            |         |                                           |                 |            |         |                                           |
| MR-Egger                     | 1.45                                | 0.94, 2.25 | 0.09    | 0.15                                      |                 |            |         |                                           |                 |            |         |                                           |
| Weighted median              | 1.04                                | 0.87, 1.23 | 0.70    |                                           |                 |            |         |                                           |                 |            |         |                                           |

Abbreviations: CI, confidence intervals; MR: Mendelian Randomization; OR: odds ratio; MR-PRESSO: MR pleiotropy residual sum and outlier test

\* The estimates correspond to a standard deviation increase in duration of sedentary activity

† P-value or pleiotropy based on MR-Egger intercept

‡ P-value for heterogeneity based on Q statistic

**Table S12: Mendelian randomization results for late rise BMI**

|                              | CRC consortium or CCFR/CORECT/GECCO |            |         |                                           | Finngen         |             |         |                                           | ACCC            |            |         |                                           |
|------------------------------|-------------------------------------|------------|---------|-------------------------------------------|-----------------|-------------|---------|-------------------------------------------|-----------------|------------|---------|-------------------------------------------|
|                              | Estimates (OR)*                     | 95% CI     | P-value | P-value for pleiotropy† or heterogeneity‡ | Estimates (OR)* | 95% CI      | P-value | P-value for pleiotropy† or heterogeneity‡ | Estimates (OR)* | 95% CI     | P-value | P-value for pleiotropy† or heterogeneity‡ |
| <b>MEN &amp; WOMEN</b>       |                                     |            |         |                                           |                 |             |         |                                           |                 |            |         |                                           |
| <b>Colorectal cancer</b>     |                                     |            |         |                                           |                 |             |         |                                           |                 |            |         |                                           |
| Inverse-variance weighted    | 0.98                                | 0.90, 1.08 | 0.76    | 0.52                                      |                 |             |         |                                           | 1.09            | 0.91, 1.31 | 0.34    | 0.81                                      |
| MR-Egger                     | 1.23                                | 0.70, 2.20 | 0.47    | 0.43                                      |                 |             |         |                                           | 2.64            | 0.17, 40.4 | 0.49    | 0.53                                      |
| Weighted median              | 0.97                                | 0.86, 1.09 | 0.60    |                                           |                 |             |         |                                           | 1.11            | 0.90, 1.36 | 0.33    |                                           |
| <b>Colon cancer</b>          |                                     |            |         |                                           |                 |             |         |                                           |                 |            |         |                                           |
| Inverse-variance weighted    | 1.04                                | 0.91, 1.20 | 0.54    | 0.83                                      | 0.88            | 0.62, 1.26  | 0.48    | 0.23                                      |                 |            |         |                                           |
| MR-Egger                     | 1.26                                | 0.55, 2.89 | 0.58    | 0.64                                      | 2.80            | 0.23, 34.8  | 0.42    | 0.36                                      |                 |            |         |                                           |
| Weighted median              | 1.00                                | 0.84, 1.17 | 0.95    |                                           | 0.84            | 0.57, 1.25  | 0.39    |                                           |                 |            |         |                                           |
| <b>Proximal colon cancer</b> |                                     |            |         |                                           |                 |             |         |                                           |                 |            |         |                                           |
| Inverse-variance weighted    | 1.05                                | 0.89, 1.26 | 0.56    | 0.80                                      |                 |             |         |                                           |                 |            |         |                                           |
| MR-Egger                     | 1.03                                | 0.35, 2.97 | 0.96    | 0.96                                      |                 |             |         |                                           |                 |            |         |                                           |
| Weighted median              | 1.03                                | 0.84, 1.27 | 0.79    |                                           |                 |             |         |                                           |                 |            |         |                                           |
| <b>Distal colon cancer</b>   |                                     |            |         |                                           |                 |             |         |                                           |                 |            |         |                                           |
| Inverse-variance weighted    | 1.01                                | 0.85, 1.21 | 0.88    | 0.80                                      |                 |             |         |                                           |                 |            |         |                                           |
| MR-Egger                     | 1.39                                | 0.47, 4.14 | 0.55    | 0.56                                      |                 |             |         |                                           |                 |            |         |                                           |
| Weighted median              | 1.00                                | 0.80, 1.25 | 0.99    |                                           |                 |             |         |                                           |                 |            |         |                                           |
| <b>Rectal cancer</b>         |                                     |            |         |                                           |                 |             |         |                                           |                 |            |         |                                           |
| Inverse-variance weighted    | 1.03                                | 0.86, 1.22 | 0.74    | 0.38                                      | 1.43            | 0.97, 2.10  | 0.07    | 0.85                                      |                 |            |         |                                           |
| MR-Egger                     | 2.03                                | 0.69, 5.93 | 0.20    | 0.21                                      | 1.00            | 0.07, 14.01 | 0.99    | 0.79                                      |                 |            |         |                                           |
| Weighted median              | 0.99                                | 0.79, 1.25 | 0.96    |                                           | 1.36            | 0.85, 2.16  | 0.20    |                                           |                 |            |         |                                           |
| <b>MEN</b>                   |                                     |            |         |                                           |                 |             |         |                                           |                 |            |         |                                           |
| <b>Colorectal cancer</b>     |                                     |            |         |                                           |                 |             |         |                                           |                 |            |         |                                           |
| Inverse-variance weighted    | 1.04                                | 0.84, 1.30 | 0.71    | 0.61                                      |                 |             |         |                                           |                 |            |         |                                           |
| MR-Egger                     | 2.61                                | 0.96, 7.10 | 0.06    | 0.07                                      |                 |             |         |                                           |                 |            |         |                                           |
| Weighted median              | 0.94                                | 0.77, 1.16 | 0.58    |                                           |                 |             |         |                                           |                 |            |         |                                           |
| <b>WOMEN</b>                 |                                     |            |         |                                           |                 |             |         |                                           |                 |            |         |                                           |
| <b>Colorectal cancer</b>     |                                     |            |         |                                           |                 |             |         |                                           |                 |            |         |                                           |
| Inverse-variance weighted    | 1.08                                | 0.92, 1.27 | 0.32    | 0.73                                      |                 |             |         |                                           |                 |            |         |                                           |
| MR-Egger                     | 0.92                                | 0.34, 2.48 | 0.87    | 0.74                                      |                 |             |         |                                           |                 |            |         |                                           |
| Weighted median              | 1.09                                | 0.90, 1.34 | 0.35    |                                           |                 |             |         |                                           |                 |            |         |                                           |

Abbreviations: CI, confidence intervals; MR: Mendelian Randomization; OR: odds ratio; MR-PRESSO: MR pleiotropy residual sum and outlier test

\* The estimates correspond to a standard deviation increase in duration of sedentary activity

† P-value or pleiotropy based on MR-Egger intercept

‡ P-value for heterogeneity based on Q statistic

**Table S13: Mendelian randomization results for birth BMI**

|                                                                     | CRC consortium or CCFR/CORECT/GECCO |            |         |                                           | Finngen         |             |         |                                           | ACCC            |            |         |                                           |
|---------------------------------------------------------------------|-------------------------------------|------------|---------|-------------------------------------------|-----------------|-------------|---------|-------------------------------------------|-----------------|------------|---------|-------------------------------------------|
|                                                                     | Estimates (OR)*                     | 95% CI     | P-value | P-value for pleiotropy† or heterogeneity‡ | Estimates (OR)* | 95% CI      | P-value | P-value for pleiotropy† or heterogeneity‡ | Estimates (OR)* | 95% CI     | P-value | P-value for pleiotropy† or heterogeneity‡ |
| <b>MEN &amp; WOMEN</b>                                              |                                     |            |         |                                           |                 |             |         |                                           |                 |            |         |                                           |
| <b>Colorectal cancer</b>                                            |                                     |            |         |                                           |                 |             |         |                                           |                 |            |         |                                           |
| Inverse-variance weighted                                           | 1.12                                | 0.79, 1.58 | 0.55    | 4×10 <sup>-23</sup>                       |                 |             |         |                                           | 1.17            | 0.98, 1.42 | 0.08    | 0.48                                      |
| MR-Egger                                                            | 0.54                                | 0.14, 2.25 | 0.40    | 0.31                                      |                 |             |         |                                           | 1.27            | 0.58, 2.75 | 0.55    | 0.85                                      |
| Weighted median                                                     | 1.00                                | 0.88, 1.14 | 0.97    |                                           |                 |             |         |                                           | 1.20            | 0.97, 1.49 | 0.10    |                                           |
| MR-PRESSO (-rs11708067, rs1482853, rs11187129, rs7310615, rs739669) | 1.08                                | 0.90, 1.30 | 0.41    | 0.95                                      |                 |             |         |                                           |                 |            |         |                                           |
| <b>Colon cancer</b>                                                 |                                     |            |         |                                           |                 |             |         |                                           |                 |            |         |                                           |
| Inverse-variance weighted                                           | 1.16                                | 0.81, 1.68 | 0.41    | 3×10 <sup>-12</sup>                       | 0.85            | 0.61, 1.19  | 0.33    | 0.10                                      |                 |            |         |                                           |
| MR-Egger                                                            | 0.49                                | 0.11, 2.16 | 0.35    | 0.24                                      | 0.81            | 0.18, 3.67  | 0.78    | 0.94                                      |                 |            |         |                                           |
| Weighted median                                                     | 1.08                                | 0.92, 1.27 | 0.34    |                                           | 0.84            | 0.59, 1.20  | 0.34    |                                           |                 |            |         |                                           |
| MR-PRESSO (-rs7310615)                                              | 1.02                                | 0.90, 1.15 | 0.80    | 0.72                                      |                 |             |         |                                           |                 |            |         |                                           |
| <b>Proximal colon cancer</b>                                        |                                     |            |         |                                           |                 |             |         |                                           |                 |            |         |                                           |
| Inverse-variance weighted                                           | 1.23                                | 0.83, 1.84 | 0.30    | 3×10 <sup>-8</sup>                        |                 |             |         |                                           |                 |            |         |                                           |
| MR-Egger                                                            | 0.44                                | 0.11, 1.84 | 0.26    | 0.14                                      |                 |             |         |                                           |                 |            |         |                                           |
| Weighted median                                                     | 1.06                                | 0.86, 1.30 | 0.59    |                                           |                 |             |         |                                           |                 |            |         |                                           |
| MR-PRESSO (-rs7310615)                                              | 1.06                                | 0.90, 1.15 | 0.80    | 0.72                                      |                 |             |         |                                           |                 |            |         |                                           |
| <b>Distal colon cancer</b>                                          |                                     |            |         |                                           |                 |             |         |                                           |                 |            |         |                                           |
| Inverse-variance weighted                                           | 1.13                                | 0.80, 1.58 | 0.48    | 2×10 <sup>-5</sup>                        |                 |             |         |                                           |                 |            |         |                                           |
| MR-Egger                                                            | 1.73                                | 0.14, 2.39 | 0.45    | 0.34                                      |                 |             |         |                                           |                 |            |         |                                           |
| Weighted median                                                     | 1.05                                | 0.85, 1.28 | 0.65    |                                           |                 |             |         |                                           |                 |            |         |                                           |
| MR-PRESSO (-rs7310615)                                              | 0.99                                | 0.84, 1.16 | 0.94    | 0.90                                      |                 |             |         |                                           |                 |            |         |                                           |
| <b>Rectal cancer</b>                                                |                                     |            |         |                                           |                 |             |         |                                           |                 |            |         |                                           |
| Inverse-variance weighted                                           | 1.09                                | 0.84, 1.43 | 0.50    | 0.003                                     | 1.49            | 0.98, 2.25  | 0.06    | 0.12                                      |                 |            |         |                                           |
| MR-Egger                                                            | 0.56                                | 0.19, 1.62 | 0.28    | 0.20                                      | 1.52            | 0.23, 10.28 | 0.66    | 0.98                                      |                 |            |         |                                           |
| Weighted median                                                     | 1.02                                | 0.83, 1.26 | 0.86    |                                           | 1.34            | 0.84, 2.14  | 0.22    |                                           |                 |            |         |                                           |
| MR-PRESSO (-rs7310615)                                              | 1.00                                | 0.85, 1.19 | 0.96    |                                           |                 |             |         |                                           |                 |            |         |                                           |
| <b>MEN</b>                                                          |                                     |            |         |                                           |                 |             |         |                                           |                 |            |         |                                           |
| <b>Colorectal cancer</b>                                            |                                     |            |         |                                           |                 |             |         |                                           |                 |            |         |                                           |
| Inverse-variance weighted                                           | 1.16                                | 0.85, 1.58 | 0.33    | 8×10 <sup>-6</sup>                        |                 |             |         |                                           |                 |            |         |                                           |
| MR-Egger                                                            | 0.60                                | 0.17, 2.16 | 0.44    | 0.30                                      |                 |             |         |                                           |                 |            |         |                                           |
| Weighted median                                                     | 1.02                                | 0.85, 1.23 | 0.80    |                                           |                 |             |         |                                           |                 |            |         |                                           |
| MR-PRESSO (-rs7310615)                                              | 1.05                                | 0.90, 1.21 | 0.52    | 0.35                                      |                 |             |         |                                           |                 |            |         |                                           |
| <b>WOMEN</b>                                                        |                                     |            |         |                                           |                 |             |         |                                           |                 |            |         |                                           |
| <b>Colorectal cancer</b>                                            |                                     |            |         |                                           |                 |             |         |                                           |                 |            |         |                                           |

|                           |      |            |      |                    |
|---------------------------|------|------------|------|--------------------|
| Inverse-variance weighted | 1.08 | 0.79, 1.49 | 0.62 | $5 \times 10^{-6}$ |
| MR-Egger                  | 0.58 | 0.15, 2.25 | 0.43 | 0.35               |
| Weighted median           | 1.02 | 0.84, 1.23 | 0.87 |                    |
| MR-PRESSO (rs7310615)     | 0.97 | 0.83, 1.13 | 0.69 | 0.33               |

---

Abbreviations: CI, confidence intervals; MR: Mendelian Randomization; OR: odds ratio; MR-PRESSO: MR pleiotropy residual sum and outlier test

\* The estimates correspond to a standard deviation increase in duration of sedentary activity

† P-value or pleiotropy based on MR-Egger intercept

‡ P-value for heterogeneity based on Q statistic
